# Supplementary material
Source: MDPI journal article supplement (https://www.mdpi.com/2079-3197/9/5/58)
Supplement: s1 [file s1]

## Supporting Information

### **Synthesis, Mass Spectroscopy Detection, and Density Functional Theory Investigations of the Fullerenols $\text{Gd@C}_{82}\text{O}_x(\text{OH})_y$ ( $x = 0, 3$ ; $y = 8, 16, 24, 36, 44$ )**

A. A. Shakirova<sup>1</sup>, F. N. Tomilin<sup>1,2</sup>, V. A. Pomogaev<sup>3,4</sup>, N.G. Vnukova<sup>1,2</sup>, G.N. Churilov<sup>1,2</sup>, N.S. Kudryasheva<sup>5</sup>, O.N. Tchaikovskaya<sup>3</sup>, S.G. Ovchinnikov<sup>1,2</sup>, and P.V. Avramov<sup>4,\*</sup>

<sup>1</sup>*Siberian Federal University, pr. Svobodny 79, Krasnoyarsk, 660041 Russia*

<sup>2</sup>*Kirensky Institute of Physics, Krasnoyarsk Scientific Center, Siberian Branch, Russian Academy of Sciences, Akademgorodok 50, Krasnoyarsk, 660036 Russia*

<sup>3</sup>*National Research Tomsk State University, ul. Lenina 36, Tomsk, 634050 Russia.*

<sup>4</sup>*Kyungpook National University, Department of Chemistry and Green-Nano Materials Research Center, 80 Daehak-ro, Buk-gu, Daegu, 41566 South Korea*

<sup>5</sup>*Institute of Biophysics, Krasnoyarsk Scientific Center, Siberian Branch, Russian Academy of Sciences, Akademgorodok 50/50, Krasnoyarsk, 660036, Russia*

\*Corresponding author. E-mail: paul.avramov@gmail.com

### Mass spectra of Gd@C<sub>82</sub> endohedral complex

Carbon condensate containing Gd@C<sub>82</sub> was synthesized in high frequency arc discharge plasma by spraying of graphite electrodes with axial holes of 3 mm in diameter. The electrodes contained a mixture of Gd<sub>2</sub>O<sub>3</sub> powder and graphite in the ratio 1:1 by weight. A fullerene mixture was separated from the carbon condensate in a Soxhlet apparatus by carbon disulfide. A mixture of Gd@C<sub>82</sub> and higher fullerenes was isolated from the solution using TiCl<sub>4</sub> Lewis acid. After that, the sample was dried and redissolved in toluene and Gd@C<sub>82</sub> endohedral complex was isolated from the solution using high-performance Agilent Technologies 1200 Series chromatograph (Cosmosil Buckyprep M column; toluene flow 5 ml/min). By treatment with acid HNO<sub>3</sub> and further washing in distilled water, O and OH groups were attached to the isolated Gd@C<sub>82</sub>. Bruker BIFLEX TM III MALDI-TOF mass spectrometer was used to obtain a mass spectrum of the endohedral complex (Figure S1). It was found that the only one Gd@C<sub>82</sub> endohedral complex has been detected in the mass spectrum, which signal clearly stands out against the background of broadband noise.

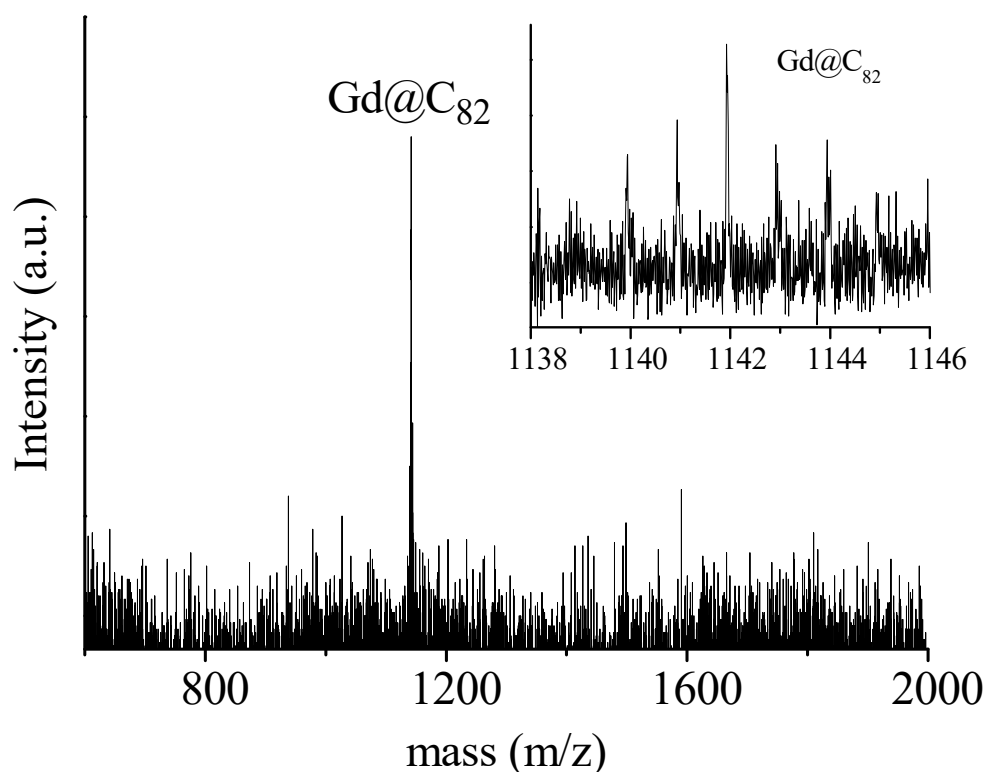

Figure S1. Mass spectrum of the chromatographic fraction with Gd@C<sub>82</sub> (positive mode)

## Solvation models and Structural Models of Gd Endohedral Complexes of Fullerenoles

Both Polarizable continuum model (PCM) and Universal solvation model based on density (SMD) methods [1] were tested to take into account solvation and spectral properties (HOMO-LUMO gaps, energy differences between isomers, e.t.c.) in fullerenole endohedral complexes. It was found that SMD model is more suitable for description of  $\text{Gd}@C_{82}\text{O}_3(\text{OH})_y$  fullerenoles in water solutions because the SMD model parameters allow one to tune the results more precisely than PCM one. So, the SMD approach was used in the study to take into account the solvation effects.

Fullerenole molecules with 8, 16, 24, 36, and 44 hydroxyl groups either symmetrically or asymmetrically distributed over  $C_{82}$  cage were designed and calculated. It was found that in contrast with asymmetrical ones, optimization of symmetrical fullerenoles mostly returns stable structures without SCF convergency problems. So, finally symmetrically distributed OH groups over the  $\text{Gd}@C_{82}$  were employed to develop the atomistic models of different fullerenols and to calculate their atomic and electronic structures (Figure 1c). The closed asymmetrical distribution of hydroxyl groups caused dramatic changes of hybridization of carbon atoms in  $C_{82}$  cage and it led to breakdown of the carbon lattice with amorphization of the  $C_{82}$  structure, which directly contradicted with the mass-spectrometry data.

- [1] Marenich, A. V.; Cramer, C. J.; Truhlar, D. G. Universal solvation model based on solute electron density and a continuum model of the solvent defined by the bulk dielectric constant and atomic surface tensions. *J. Phys. Chem.* **2009**, *113*, 6378-96.

## Electronic and solvation properties of $\text{Gd}@\text{C}_{82}\text{O}_3(\text{OH})_y$ fullerenols

Table S1. Energy of solvation of  $\text{Gd}@\text{C}_{82}\text{O}_3(\text{OH})_y$ ,  $\text{C}_{82}\text{O}_3(\text{OH})_y$  and  $\text{C}_{82}\text{O}_8(\text{OH})_y$

| Energy of solvation | Complexes                                        |                                                     |                                                     |                                                     |                                                     |
|---------------------|--------------------------------------------------|-----------------------------------------------------|-----------------------------------------------------|-----------------------------------------------------|-----------------------------------------------------|
|                     | $\text{C}_{82}\text{O}_x(\text{OH})_y$           |                                                     |                                                     |                                                     |                                                     |
| E, kJ/mol           | $\text{C}_{82}\text{O}_3(\text{OH})_8$           | $\text{C}_{82}\text{O}_3(\text{OH})_{16}$           | $\text{C}_{82}\text{O}_3(\text{OH})_{24}$           | $\text{C}_{82}\text{O}_3(\text{OH})_{36}$           | $\text{C}_{82}\text{O}_3(\text{OH})_{44}$           |
|                     | 213                                              | 344                                                 | 402                                                 | -                                                   | -                                                   |
| E, kJ/mol           | $\text{C}_{82}\text{O}_8(\text{OH})_8$           | $\text{C}_{82}\text{O}_8(\text{OH})_{16}$           | $\text{C}_{82}\text{O}_8(\text{OH})_{24}$           | $\text{C}_{82}\text{O}_8(\text{OH})_{36}$           | $\text{C}_{82}\text{O}_8(\text{OH})_{44}$           |
|                     | 165                                              | 242                                                 | 298                                                 | 258                                                 | 288                                                 |
|                     | $\text{Gd}@\text{C}_{82}\text{O}_x(\text{OH})_y$ |                                                     |                                                     |                                                     |                                                     |
| E, kJ/mol           | $\text{Gd}@\text{C}_{82}\text{O}_3(\text{OH})_8$ | $\text{Gd}@\text{C}_{82}\text{O}_3(\text{OH})_{16}$ | $\text{Gd}@\text{C}_{82}\text{O}_3(\text{OH})_{24}$ | $\text{Gd}@\text{C}_{82}\text{O}_3(\text{OH})_{36}$ | $\text{Gd}@\text{C}_{82}\text{O}_3(\text{OH})_{44}$ |
|                     | 712                                              | 793                                                 | 730                                                 | -                                                   | -                                                   |

Energy of solvation calculated at MN15/def(2)-TZVP level of theory.

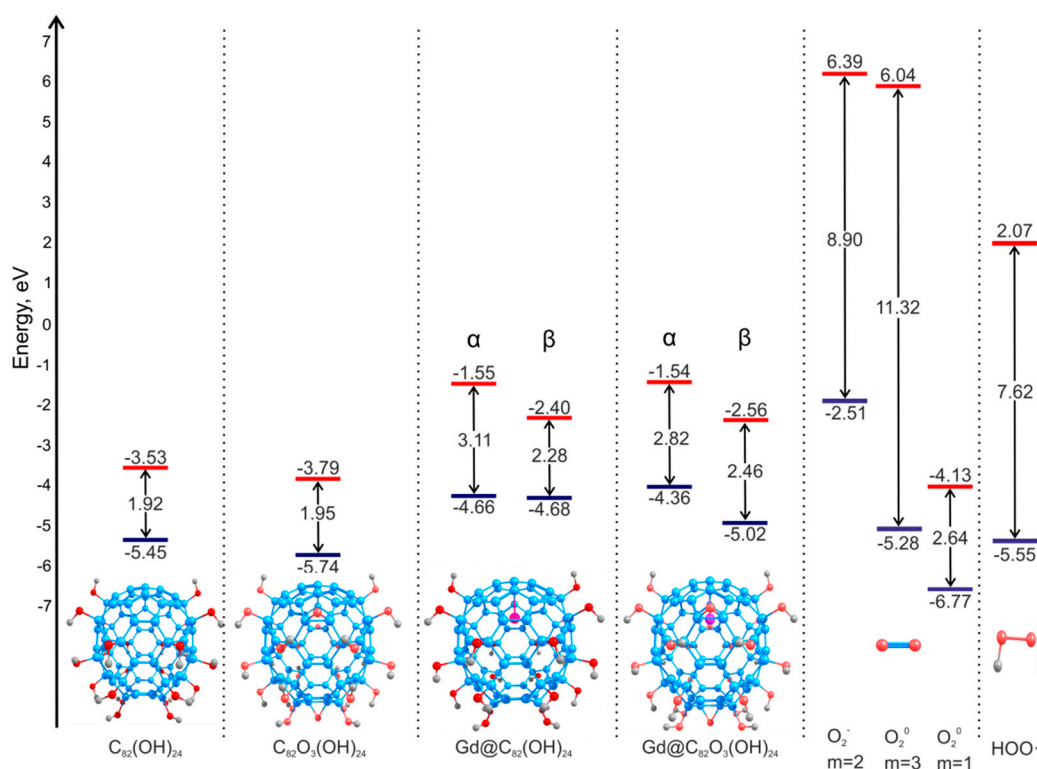

Figure S2. Diagram of the boundary molecular orbitals of  $\text{C}_{82}\text{O}_x(\text{OH})_{24}$ ,  $\text{Gd}@\text{C}_{82}\text{O}_x(\text{OH})_{24}$  ( $x = 0, 3$ ),  $\text{O}_2^0$  ( $m = 1, 3$ ),  $\text{O}_2^-$  ( $m = 2$ ), and  $\text{HOO}^\bullet$  in the solvent ( $\text{H}_2\text{O}$ ). The HOMO and LUMO levels are shown in blue and red color, respectively. The number between the HOMO and LUMO is the energy gap ( $\Delta E_{\text{HOMO-LUMO}}$ , eV).

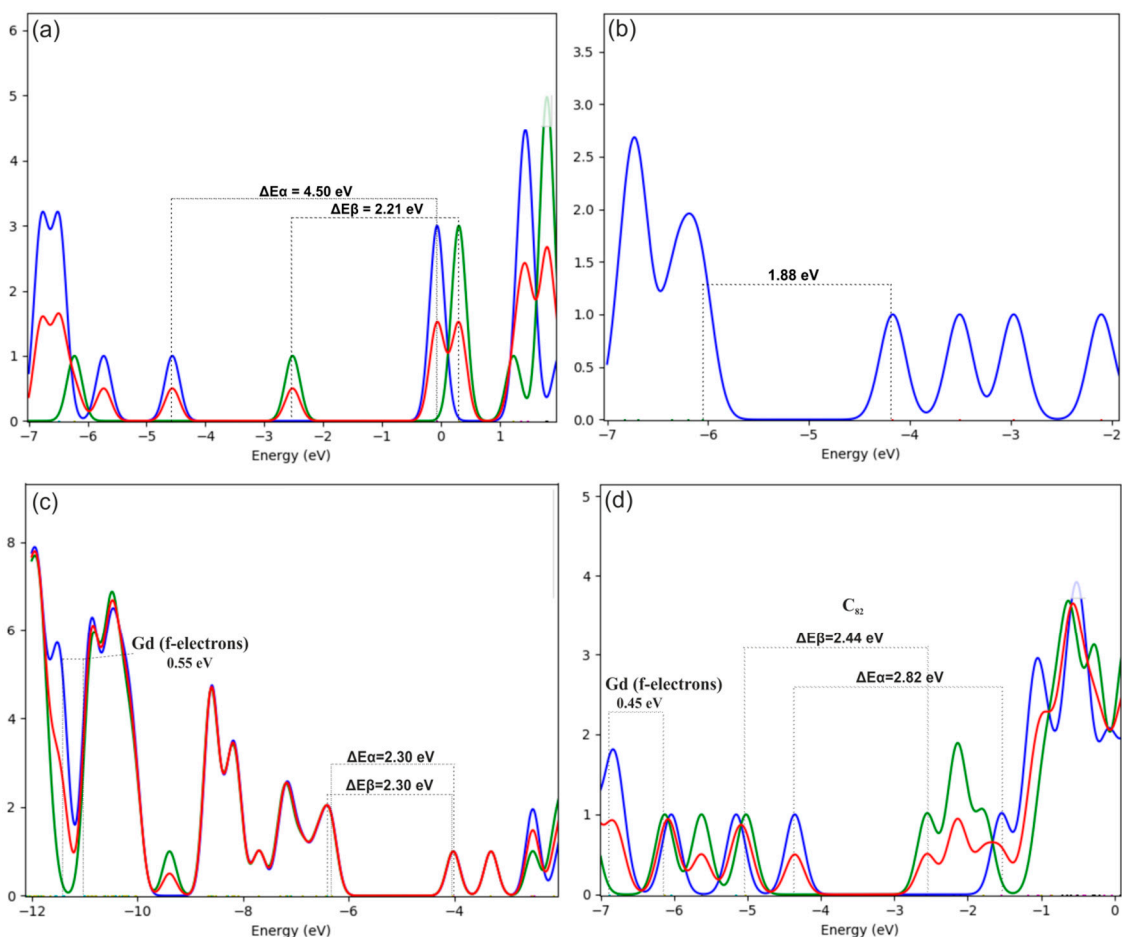

Figure S3. Densities of states of  $\text{Gd@C}_{82}\text{O}_x(\text{OH})_y$ . TDOS is total density of states, PDOS is partial density of states. Gd,  $\text{C}_{82}$  and  $\text{Gd@C}_{82}$  were calculated in gas phase,  $\text{Gd@C}_{82}\text{O}_3(\text{OH})_{24}$  in water solvent. (a) Gd: TDOS is shown in red color and multiplied by 0.5, PDOS of  $\alpha$ -  $\beta$ -channels are shown in blue and green colors, respectively; (b)  $\text{C}_{82}$ : TDOS is shown in blue color; (c)  $\text{Gd@C}_{82}$ : TDOS is shown in red color and multiplied by 0.5, PDOS of  $\alpha$ -  $\beta$ -channels are shown in blue and green colors; (d)  $\text{Gd@C}_{82}\text{O}_3(\text{OH})_{24}$ : TDOS is shown in red color and multiplied by 0.5, PDOS of  $\alpha$ -  $\beta$ -channels are shown in blue and green colors. Dotted line shows HOMO-LUMO energy gap  $\Delta E$ .

Total (TDOS) and partial (PDOS) density of states (DOS) of free-standing Gd atom, free-standing  $\text{C}_{82}$  fullerene,  $\text{Gd@C}_{82}$  and  $\text{Gd@C}_{82}\text{O}_3(\text{OH})_{24}$  endohedral complexes are presented in Figure S2. For free-standing gadolinium, the energy ranges from -4.56 to -0.06 eV ( $\Delta E = 4.50$  eV) for  $\alpha$  electrons and from -2.52 to -0.31 eV ( $\Delta E = 2.21$  eV) for  $\beta$  electrons. The energy for  $\text{C}_{82}$  fullerene lies between -6.05 and -4.17 eV ( $\Delta E = 1.88$  eV) of TDOS. The partial density of states of  $\alpha$  electrons of  $\text{Gd@C}_{82}$  ranges from -6.31 to -4.01 eV ( $\Delta E = 2.30$  eV) and the PDOS of  $\beta$  electrons, from -6.32 to -4.02 eV ( $\Delta E = 2.30$  eV). In addition, the PDOS of 7 electrons are lower in energy in the range from -11.00 to -11.55 eV ( $\Delta E = 0.55$  eV).  $\alpha$  and  $\beta$  PDOS of  $\text{Gd@C}_{82}\text{O}_3(\text{OH})_{24}$  shifts upward in energy relative to  $\text{Gd@C}_{82}$  to the energy range from -4.36 to -1.54 eV ( $\Delta E = 2.82$  eV) and from -5.02 to -2.56 eV ( $\Delta E = 2.44$  eV), respectively. Gd 4f-electrons shift to the energy range from -6.44 to -6.89 eV ( $\Delta E = 0.45$  eV).

### Cartesian coordinates

Atomic Cartesian coordinates of complexes under investigation (in Å: X, Y, Z) are presented below. Equilibrium ground states calculated at MN15/def(2)-TZVP level of theory. Carbon, gadolinium, oxygen, and hydrogen atoms are shown in blue, fuchsia, red, and gray colors, respectively.

#### Gd@C<sub>82</sub>

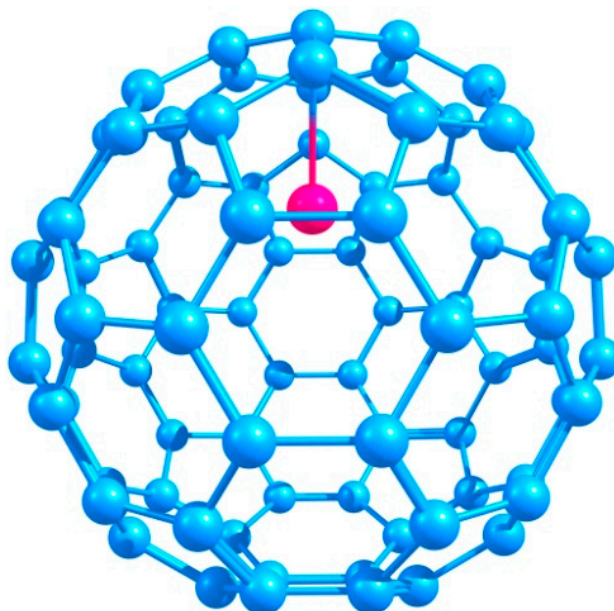

#### MN15/def(2)-TZVP//gas phase//Ground state

|   |              |              |              |
|---|--------------|--------------|--------------|
| C | 2.670239922  | 0.000000000  | 2.940500419  |
| C | -2.670239922 | 0.000000000  | 2.940500419  |
| C | -3.094894033 | -1.162021867 | 2.194492657  |
| C | 3.094894033  | 1.162021867  | 2.194492657  |
| C | 3.094894033  | -1.162021867 | 2.194492657  |
| C | -3.094894033 | 1.162021867  | 2.194492657  |
| C | 3.744337797  | -0.721083726 | 1.005701886  |
| C | -3.744337797 | 0.721083726  | 1.005701886  |
| C | -3.744337797 | -0.721083726 | 1.005701886  |
| C | 3.744337797  | 0.721083726  | 1.005701886  |
| C | -2.378342122 | -3.170307811 | 1.058092938  |
| C | 2.378342122  | 3.170307811  | 1.058092938  |
| C | 2.378342122  | -3.170307811 | 1.058092938  |
| C | -2.378342122 | 3.170307811  | 1.058092938  |
| C | -3.688302750 | -1.464488370 | -0.200486973 |
| C | 3.688302750  | 1.464488370  | -0.200486973 |

|   |              |              |              |
|---|--------------|--------------|--------------|
| C | 3.688302750  | -1.464488370 | -0.200486973 |
| C | -3.688302750 | 1.464488370  | -0.200486973 |
| C | -3.084149487 | -2.749905236 | -0.111720491 |
| C | 3.084149487  | 2.749905236  | -0.111720491 |
| C | 3.084149487  | -2.749905236 | -0.111720491 |
| C | -3.084149487 | 2.749905236  | -0.111720491 |
| C | -2.343005542 | -2.369675750 | 2.220186950  |
| C | 2.343005542  | 2.369675750  | 2.220186950  |
| C | 2.343005542  | -2.369675750 | 2.220186950  |
| C | -2.343005542 | 2.369675750  | 2.220186950  |
| C | 3.660644629  | -0.733559041 | -1.468895851 |
| C | -3.660644629 | 0.733559041  | -1.468895851 |
| C | -3.660644629 | -0.733559041 | -1.468895851 |
| C | 3.660644629  | 0.733559041  | -1.468895851 |
| C | -2.393795530 | -3.320383024 | -1.237731865 |
| C | 2.393795530  | 3.320383024  | -1.237731865 |
| C | 2.393795530  | -3.320383024 | -1.237731865 |
| C | -2.393795530 | 3.320383024  | -1.237731865 |
| C | -2.396698843 | -2.662716878 | -2.440429929 |
| C | 2.396698843  | 2.662716878  | -2.440429929 |
| C | 2.396698843  | -2.662716878 | -2.440429929 |
| C | -2.396698843 | 2.662716878  | -2.440429929 |
| C | -3.085940242 | -1.397734784 | -2.576778259 |
| C | 3.085940242  | 1.397734784  | -2.576778259 |
| C | 3.085940242  | -1.397734784 | -2.576778259 |
| C | -3.085940242 | 1.397734784  | -2.576778259 |
| C | 2.395363344  | -0.686196886 | -3.610608319 |
| C | -2.395363344 | 0.686196886  | -3.610608319 |
| C | -2.395363344 | -0.686196886 | -3.610608319 |
| C | 2.395363344  | 0.686196886  | -3.610608319 |
| C | 1.201948616  | -2.650090691 | -3.266239285 |
| C | -1.201948616 | 2.650090691  | -3.266239285 |
| C | -1.201948616 | -2.650090691 | -3.266239285 |
| C | 1.201948616  | 2.650090691  | -3.266239285 |
| C | -1.198685742 | -1.424847293 | -3.987144085 |

|    |              |              |              |
|----|--------------|--------------|--------------|
| C  | 1.198685742  | 1.424847293  | -3.987144085 |
| C  | 1.198685742  | -1.424847293 | -3.987144085 |
| C  | -1.198685742 | 1.424847293  | -3.987144085 |
| C  | -1.205343084 | -4.012589364 | -0.777929704 |
| C  | 1.205343084  | 4.012589364  | -0.777929704 |
| C  | 1.205343084  | -4.012589364 | -0.777929704 |
| C  | -1.205343084 | 4.012589364  | -0.777929704 |
| C  | -1.209565297 | -3.937410495 | 0.640066858  |
| C  | 1.209565297  | 3.937410495  | 0.640066858  |
| C  | 1.209565297  | -3.937410495 | 0.640066858  |
| C  | -1.209565297 | 3.937410495  | 0.640066858  |
| C  | 1.155077755  | -2.385267970 | 3.033195143  |
| C  | -1.155077755 | 2.385267970  | 3.033195143  |
| C  | -1.155077755 | -2.385267970 | 3.033195143  |
| C  | 1.155077755  | 2.385267970  | 3.033195143  |
| C  | 0.724679240  | -1.230896216 | 3.771183017  |
| C  | -0.724679240 | 1.230896216  | 3.771183017  |
| C  | -0.724679240 | -1.230896216 | 3.771183017  |
| C  | 0.724679240  | 1.230896216  | 3.771183017  |
| C  | -1.477311649 | 0.000000000  | 3.709755862  |
| C  | 1.477311649  | 0.000000000  | 3.709755862  |
| C  | 0.000000000  | -0.735859610 | -4.304965727 |
| C  | 0.000000000  | 0.735859610  | -4.304965727 |
| C  | 0.000000000  | -3.265611483 | -2.817478511 |
| C  | 0.000000000  | 3.265611483  | -2.817478511 |
| C  | 0.000000000  | -3.969876704 | -1.533095605 |
| C  | 0.000000000  | 3.969876704  | -1.533095605 |
| C  | 0.000000000  | -3.864504772 | 1.380015689  |
| C  | 0.000000000  | 3.864504772  | 1.380015689  |
| C  | 0.000000000  | -3.106307639 | 2.600746546  |
| C  | 0.000000000  | 3.106307639  | 2.600746546  |
| Gd | 0.000000000  | 0.000000000  | 1.448991552  |



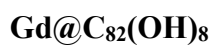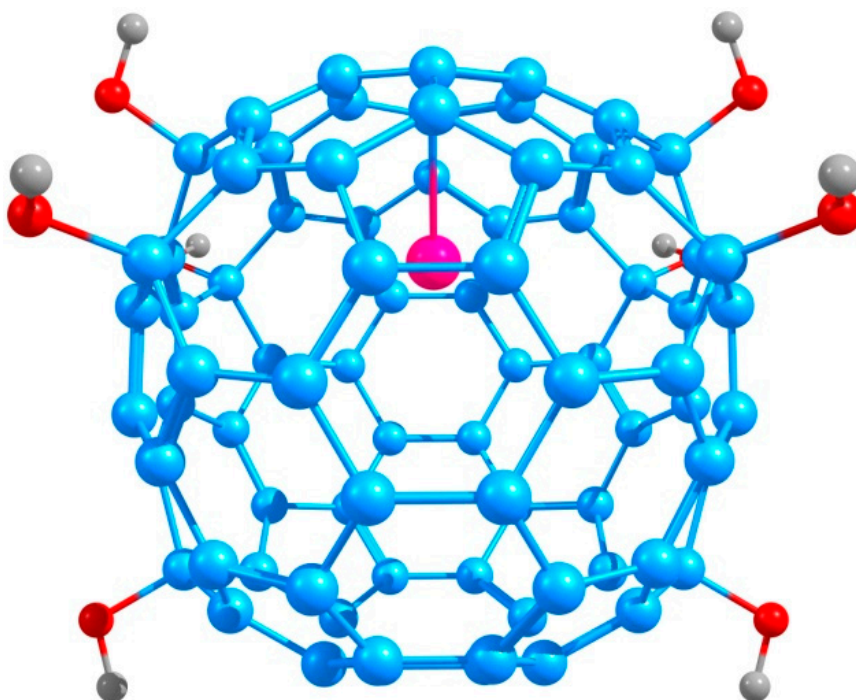

**MN15/def(2)-TZVP//H<sub>2</sub>O//Ground state**

|   |              |              |              |
|---|--------------|--------------|--------------|
| C | 2.638161026  | 0.000000000  | -2.832302034 |
| C | -2.638161026 | 0.000000000  | -2.832302034 |
| C | 3.073445277  | 1.155083765  | -2.120745275 |
| C | -3.073445277 | -1.155083765 | -2.120745275 |
| C | -3.073445277 | 1.155083765  | -2.120745275 |
| C | 3.073445277  | -1.155083765 | -2.120745275 |
| C | 3.774172028  | 0.695138132  | -0.925582687 |
| C | -3.774172028 | -0.695138132 | -0.925582687 |
| C | -3.774172028 | 0.695138132  | -0.925582687 |
| C | 3.774172028  | -0.695138132 | -0.925582687 |
| C | 2.556400766  | 3.375302003  | -1.096753579 |
| C | -2.556400766 | -3.375302003 | -1.096753579 |
| C | -2.556400766 | 3.375302003  | -1.096753579 |
| C | 2.556400766  | -3.375302003 | -1.096753579 |
| C | 3.704301276  | -1.461030834 | 0.288809211  |
| C | -3.704301276 | 1.461030834  | 0.288809211  |
| C | -3.704301276 | -1.461030834 | 0.288809211  |
| C | 3.704301276  | 1.461030834  | 0.288809211  |
| C | 3.107023770  | -2.731627722 | 0.195753564  |

|   |              |              |              |
|---|--------------|--------------|--------------|
| C | -3.107023770 | 2.731627722  | 0.195753564  |
| C | -3.107023770 | -2.731627722 | 0.195753564  |
| C | 3.107023770  | 2.731627722  | 0.195753564  |
| C | 2.344672269  | 2.341448254  | -2.185143287 |
| C | -2.344672269 | -2.341448254 | -2.185143287 |
| C | -2.344672269 | 2.341448254  | -2.185143287 |
| C | 2.344672269  | -2.341448254 | -2.185143287 |
| C | 3.663697276  | 0.731253532  | 1.551906071  |
| C | -3.663697276 | -0.731253532 | 1.551906071  |
| C | -3.663697276 | 0.731253532  | 1.551906071  |
| C | 3.663697276  | -0.731253532 | 1.551906071  |
| C | 2.405557017  | 3.273467044  | 1.292180424  |
| C | -2.405557017 | -3.273467044 | 1.292180424  |
| C | -2.405557017 | 3.273467044  | 1.292180424  |
| C | 2.405557017  | -3.273467044 | 1.292180424  |
| C | 2.387567017  | -2.648138634 | 2.529152440  |
| C | -2.387567017 | 2.648138634  | 2.529152440  |
| C | -2.387567017 | -2.648138634 | 2.529152440  |
| C | 2.387567017  | 2.648138634  | 2.529152440  |
| C | 3.089533023  | 1.399310139  | 2.667561681  |
| C | -3.089533023 | -1.399310139 | 2.667561681  |
| C | -3.089533023 | 1.399310139  | 2.667561681  |
| C | 3.089533023  | -1.399310139 | 2.667561681  |
| C | 2.378180769  | 0.687170027  | 3.683266673  |
| C | -2.378180769 | -0.687170027 | 3.683266673  |
| C | -2.378180769 | 0.687170027  | 3.683266673  |
| C | 2.378180769  | -0.687170027 | 3.683266673  |
| C | 1.212884507  | 2.658764448  | 3.369321482  |
| C | -1.212884507 | -2.658764448 | 3.369321482  |
| C | -1.212884507 | 2.658764448  | 3.369321482  |
| C | 1.212884507  | -2.658764448 | 3.369321482  |
| C | 1.194732259  | 1.435895577  | 4.067671066  |
| C | -1.194732259 | -1.435895577 | 4.067671066  |
| C | -1.194732259 | 1.435895577  | 4.067671066  |
| C | 1.194732259  | -1.435895577 | 4.067671066  |

|   |              |              |              |
|---|--------------|--------------|--------------|
| C | 1.182551758  | 3.902526131  | 0.810893072  |
| C | -1.182551758 | -3.902526131 | 0.810893072  |
| C | -1.182551758 | 3.902526131  | 0.810893072  |
| C | 1.182551758  | -3.902526131 | 0.810893072  |
| C | 1.191907007  | 3.850968708  | -0.595048778 |
| C | -1.191907007 | -3.850968708 | -0.595048778 |
| C | -1.191907007 | 3.850968708  | -0.595048778 |
| C | 1.191907007  | -3.850968708 | -0.595048778 |
| C | 1.184799252  | 2.378698533  | -2.992629723 |
| C | -1.184799252 | -2.378698533 | -2.992629723 |
| C | -1.184799252 | 2.378698533  | -2.992629723 |
| C | 1.184799252  | -2.378698533 | -2.992629723 |
| C | 0.732436751  | 1.231082879  | -3.650689174 |
| C | -0.732436751 | -1.231082879 | -3.650689174 |
| C | -0.732436751 | 1.231082879  | -3.650689174 |
| C | 0.732436751  | -1.231082879 | -3.650689174 |
| C | 1.450841510  | 0.000000000  | -3.587254431 |
| C | -1.450841510 | 0.000000000  | -3.587254431 |
| C | 0.000000000  | 0.720813113  | 4.427211293  |
| C | 0.000000000  | -0.720813113 | 4.427211293  |
| C | 0.000000000  | -3.528589657 | 3.078222715  |
| C | 0.000000000  | 3.528589657  | 3.078222715  |
| C | 0.000000000  | 3.900501747  | 1.573420271  |
| C | 0.000000000  | -3.900501747 | 1.573420271  |
| C | 0.000000000  | 3.789976671  | -1.319442421 |
| C | 0.000000000  | -3.789976671 | -1.319442421 |
| C | 0.000000000  | -3.334941031 | -2.762006757 |
| C | 0.000000000  | 3.334941031  | -2.762006757 |
| O | 0.000000000  | 4.766940832  | 3.800457859  |
| O | 0.000000000  | -4.766940832 | 3.800457859  |
| H | 0.000000000  | -4.544362515 | 4.746868789  |
| H | 0.000000000  | 4.544362515  | 4.746868789  |
| O | 0.000000000  | 4.469153669  | -3.600986604 |
| O | 0.000000000  | -4.469153669 | -3.600986604 |
| H | 0.000000000  | 4.166232888  | -4.525004645 |

|    |              |              |              |
|----|--------------|--------------|--------------|
| H  | 0.000000000  | -4.166232888 | -4.525004645 |
| O  | 3.315443016  | 4.479947527  | -1.548925661 |
| O  | -3.315443016 | -4.479947527 | -1.548925661 |
| O  | -3.315443016 | 4.479947527  | -1.548925661 |
| O  | 3.315443016  | -4.479947527 | -1.548925661 |
| H  | 4.183189503  | 4.152693794  | -1.839989480 |
| H  | -4.183189503 | -4.152693794 | -1.839989480 |
| H  | -4.183189503 | 4.152693794  | -1.839989480 |
| H  | 4.183189503  | -4.152693794 | -1.839989480 |
| Gd | 0.000000000  | 0.000000000  | -1.246774078 |

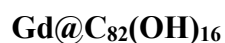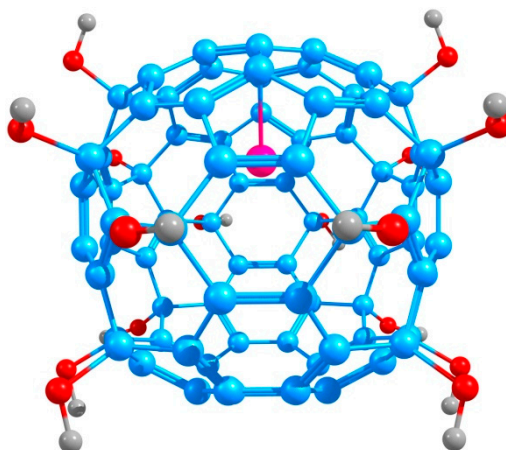

**MN15/def(2)-TZVP//H<sub>2</sub>O//Ground state**

|   |              |              |              |
|---|--------------|--------------|--------------|
| C | 2.622286343  | 0.000000000  | 2.962445604  |
| C | -2.622286343 | 0.000000000  | 2.962445604  |
| C | 3.043089804  | -1.148753907 | 2.239730096  |
| C | -3.043089804 | 1.148753907  | 2.239730096  |
| C | -3.043089804 | -1.148753907 | 2.239730096  |
| C | 3.043089804  | 1.148753907  | 2.239730096  |
| C | 3.748267862  | -0.690810050 | 1.063610012  |
| C | -3.748267862 | 0.690810050  | 1.063610012  |
| C | -3.748267862 | -0.690810050 | 1.063610012  |
| C | 3.748267862  | 0.690810050  | 1.063610012  |
| C | 2.547379489  | -3.378939751 | 1.270661847  |
| C | -2.547379489 | 3.378939751  | 1.270661847  |
| C | -2.547379489 | -3.378939751 | 1.270661847  |
| C | 2.547379489  | 3.378939751  | 1.270661847  |
| C | 4.061172987  | -1.559070190 | -0.125582987 |
| C | -4.061172987 | 1.559070190  | -0.125582987 |
| C | -4.061172987 | -1.559070190 | -0.125582987 |
| C | 4.061172987  | 1.559070190  | -0.125582987 |
| C | 3.104187004  | -2.748376630 | -0.027452622 |
| C | -3.104187004 | 2.748376630  | -0.027452622 |
| C | -3.104187004 | -2.748376630 | -0.027452622 |
| C | 3.104187004  | 2.748376630  | -0.027452622 |
| C | 2.303598679  | -2.340281745 | 2.329461121  |

|   |              |              |              |
|---|--------------|--------------|--------------|
| C | -2.303598679 | 2.340281745  | 2.329461121  |
| C | -2.303598679 | -2.340281745 | 2.329461121  |
| C | 2.303598679  | 2.340281745  | 2.329461121  |
| C | 2.410895704  | -3.245807026 | -1.065877848 |
| C | -2.410895704 | 3.245807026  | -1.065877848 |
| C | -2.410895704 | -3.245807026 | -1.065877848 |
| C | 2.410895704  | 3.245807026  | -1.065877848 |
| C | 3.724151119  | -0.727088191 | -1.395768446 |
| C | -3.724151119 | 0.727088191  | -1.395768446 |
| C | -3.724151119 | -0.727088191 | -1.395768446 |
| C | 3.724151119  | 0.727088191  | -1.395768446 |
| C | 2.586594128  | -2.824837753 | -2.476758051 |
| C | -2.586594128 | 2.824837753  | -2.476758051 |
| C | -2.586594128 | -2.824837753 | -2.476758051 |
| C | 2.586594128  | 2.824837753  | -2.476758051 |
| C | 3.127166701  | -1.391055433 | -2.466070473 |
| C | -3.127166701 | 1.391055433  | -2.466070473 |
| C | -3.127166701 | -1.391055433 | -2.466070473 |
| C | 3.127166701  | 1.391055433  | -2.466070473 |
| C | 2.397280113  | -0.684169724 | -3.442827599 |
| C | -2.397280113 | 0.684169724  | -3.442827599 |
| C | -2.397280113 | -0.684169724 | -3.442827599 |
| C | 2.397280113  | 0.684169724  | -3.442827599 |
| C | 1.216495226  | -2.651012124 | -3.141164825 |
| C | -1.216495226 | 2.651012124  | -3.141164825 |
| C | -1.216495226 | -2.651012124 | -3.141164825 |
| C | 1.216495226  | 2.651012124  | -3.141164825 |
| C | 1.188686006  | -1.434958532 | -3.786285815 |
| C | -1.188686006 | 1.434958532  | -3.786285815 |
| C | -1.188686006 | -1.434958532 | -3.786285815 |
| C | 1.188686006  | 1.434958532  | -3.786285815 |
| C | 1.181049948  | -3.909622438 | -0.610760881 |
| C | -1.181049948 | 3.909622438  | -0.610760881 |
| C | -1.181049948 | -3.909622438 | -0.610760881 |
| C | 1.181049948  | 3.909622438  | -0.610760881 |

|   |              |              |              |
|---|--------------|--------------|--------------|
| C | 1.194990067  | -3.912886098 | 0.791211361  |
| C | -1.194990067 | 3.912886098  | 0.791211361  |
| C | -1.194990067 | -3.912886098 | 0.791211361  |
| C | 1.194990067  | 3.912886098  | 0.791211361  |
| C | 1.180352043  | -2.400027046 | 3.154694551  |
| C | -1.180352043 | 2.400027046  | 3.154694551  |
| C | -1.180352043 | -2.400027046 | 3.154694551  |
| C | 1.180352043  | 2.400027046  | 3.154694551  |
| C | 0.720327734  | -1.228361993 | 3.806508349  |
| C | -0.720327734 | 1.228361993  | 3.806508349  |
| C | -0.720327734 | -1.228361993 | 3.806508349  |
| C | 0.720327734  | 1.228361993  | 3.806508349  |
| C | 1.430864075  | 0.000000000  | 3.719682396  |
| C | -1.430864075 | 0.000000000  | 3.719682396  |
| C | 0.000000000  | -0.717333292 | -4.147634691 |
| C | 0.000000000  | 0.717333292  | -4.147634691 |
| C | 0.000000000  | -3.509143171 | -2.854132144 |
| C | 0.000000000  | 3.509143171  | -2.854132144 |
| C | 0.000000000  | -3.911729279 | -1.366085778 |
| C | 0.000000000  | 3.911729279  | -1.366085778 |
| C | 0.000000000  | -3.861485352 | 1.518440159  |
| C | 0.000000000  | 3.861485352  | 1.518440159  |
| C | 0.000000000  | -3.366128185 | 2.951280746  |
| C | 0.000000000  | 3.366128185  | 2.951280746  |
| O | 0.000000000  | -4.743873851 | -3.589025275 |
| O | 0.000000000  | 4.743873851  | -3.589025275 |
| H | 0.000000000  | -4.511039931 | -4.532654123 |
| H | 0.000000000  | 4.511039931  | -4.532654123 |
| O | 0.000000000  | -4.477130289 | 3.825782694  |
| O | 0.000000000  | 4.477130289  | 3.825782694  |
| H | 0.000000000  | -4.141772296 | 4.738208773  |
| H | 0.000000000  | 4.141772296  | 4.738208773  |
| O | 3.391437787  | -4.398018973 | 1.768436984  |
| O | -3.391437787 | 4.398018973  | 1.768436984  |
| O | -3.391437787 | -4.398018973 | 1.768436984  |

|    |              |              |              |
|----|--------------|--------------|--------------|
| O  | 3.391437787  | 4.398018973  | 1.768436984  |
| H  | 3.911417230  | -4.545064960 | 1.526865024  |
| H  | -3.911417230 | 4.545064960  | 1.526865024  |
| H  | -3.911417230 | -4.545064960 | 1.526865024  |
| H  | 3.911417230  | 4.545064960  | 1.526865024  |
| O  | 3.438356357  | -3.728544298 | -3.162264295 |
| O  | -3.438356357 | 3.728544298  | -3.162264295 |
| O  | -3.438356357 | -3.728544298 | -3.162264295 |
| O  | 3.438356357  | 3.728544298  | -3.162264295 |
| H  | 3.184485134  | -4.031842168 | -3.728267818 |
| H  | -3.184485134 | 4.031842168  | -3.728267818 |
| H  | -3.184485134 | -4.031842168 | -3.728267818 |
| H  | 3.184485134  | 4.031842168  | -3.728267818 |
| O  | 5.407072769  | -2.009061079 | -0.131308299 |
| O  | -5.407072769 | 2.009061079  | -0.131308299 |
| O  | -5.407072769 | -2.009061079 | -0.131308299 |
| O  | 5.407072769  | 2.009061079  | -0.131308299 |
| H  | 5.890035857  | -1.572053017 | -0.272227665 |
| H  | -5.890035857 | 1.572053017  | -0.272227665 |
| H  | -5.890035857 | -1.572053017 | -0.272227665 |
| H  | 5.890035857  | 1.572053017  | -0.272227665 |
| Gd | 0.000000000  | 0.000000000  | 1.387462556  |



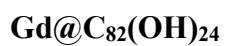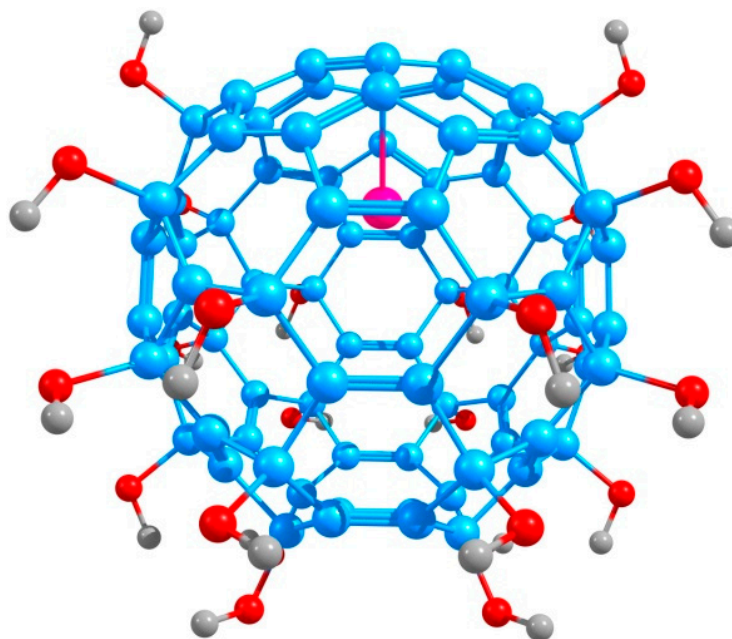

**MN15/def(2)-TZVP//H<sub>2</sub>O//Ground state**

|   |              |              |             |
|---|--------------|--------------|-------------|
| C | -2.623605622 | 0.000000000  | 3.305476921 |
| C | 2.623605622  | 0.000000000  | 3.305476921 |
| C | -3.057833756 | 1.155930311  | 2.594017143 |
| C | 3.057833756  | -1.155930311 | 2.594017143 |
| C | 3.057833756  | 1.155930311  | 2.594017143 |
| C | -3.057833756 | -1.155930311 | 2.594017143 |
| C | -3.777026204 | 0.699395195  | 1.446271998 |
| C | 3.777026204  | -0.699395195 | 1.446271998 |
| C | 3.777026204  | 0.699395195  | 1.446271998 |
| C | -3.777026204 | -0.699395195 | 1.446271998 |
| C | -2.537842509 | 3.375264287  | 1.591970708 |
| C | 2.537842509  | -3.375264287 | 1.591970708 |
| C | 2.537842509  | 3.375264287  | 1.591970708 |
| C | -2.537842509 | -3.375264287 | 1.591970708 |
| C | -3.969607682 | 1.525085901  | 0.212168636 |
| C | 3.969607682  | -1.525085901 | 0.212168636 |
| C | 3.969607682  | 1.525085901  | 0.212168636 |
| C | -3.969607682 | -1.525085901 | 0.212168636 |
| C | -3.044945297 | 2.707751826  | 0.329463757 |
| C | 3.044945297  | -2.707751826 | 0.329463757 |

|   |              |              |              |
|---|--------------|--------------|--------------|
| C | 3.044945297  | 2.707751826  | 0.329463757  |
| C | -3.044945297 | -2.707751826 | 0.329463757  |
| C | -2.314476317 | 2.371728191  | 2.692963302  |
| C | 2.314476317  | -2.371728191 | 2.692963302  |
| C | 2.314476317  | 2.371728191  | 2.692963302  |
| C | -2.314476317 | -2.371728191 | 2.692963302  |
| C | -3.603324195 | 0.675495579  | -1.023514942 |
| C | 3.603324195  | -0.675495579 | -1.023514942 |
| C | 3.603324195  | 0.675495579  | -1.023514942 |
| C | -3.603324195 | -0.675495579 | -1.023514942 |
| C | -2.531513529 | 3.486154408  | -0.840494216 |
| C | 2.531513529  | -3.486154408 | -0.840494216 |
| C | 2.531513529  | 3.486154408  | -0.840494216 |
| C | -2.531513529 | -3.486154408 | -0.840494216 |
| C | -2.326361805 | 2.576034244  | -1.994438287 |
| C | 2.326361805  | -2.576034244 | -1.994438287 |
| C | 2.326361805  | 2.576034244  | -1.994438287 |
| C | -2.326361805 | -2.576034244 | -1.994438287 |
| C | -3.294866238 | 1.464835205  | -2.300145442 |
| C | 3.294866238  | -1.464835205 | -2.300145442 |
| C | 3.294866238  | 1.464835205  | -2.300145442 |
| C | -3.294866238 | -1.464835205 | -2.300145442 |
| C | -2.450260810 | 0.664024668  | -3.277009823 |
| C | 2.450260810  | -0.664024668 | -3.277009823 |
| C | 2.450260810  | 0.664024668  | -3.277009823 |
| C | -2.450260810 | -0.664024668 | -3.277009823 |
| C | -1.208813202 | 2.541383483  | -2.728139147 |
| C | 1.208813202  | -2.541383483 | -2.728139147 |
| C | 1.208813202  | 2.541383483  | -2.728139147 |
| C | -1.208813202 | -2.541383483 | -2.728139147 |
| C | -1.282514999 | 1.480687744  | -3.808818887 |
| C | 1.282514999  | -1.480687744 | -3.808818887 |
| C | 1.282514999  | 1.480687744  | -3.808818887 |
| C | -1.282514999 | -1.480687744 | -3.808818887 |
| C | -1.184471553 | 3.928819350  | -0.317076536 |

|   |              |              |              |
|---|--------------|--------------|--------------|
| C | 1.184471553  | -3.928819350 | -0.317076536 |
| C | 1.184471553  | 3.928819350  | -0.317076536 |
| C | -1.184471553 | -3.928819350 | -0.317076536 |
| C | -1.189116227 | 3.875767740  | 1.081764285  |
| C | 1.189116227  | -3.875767740 | 1.081764285  |
| C | 1.189116227  | 3.875767740  | 1.081764285  |
| C | -1.189116227 | -3.875767740 | 1.081764285  |
| C | -1.183545533 | 2.417237059  | 3.481169510  |
| C | 1.183545533  | -2.417237059 | 3.481169510  |
| C | 1.183545533  | 2.417237059  | 3.481169510  |
| C | -1.183545533 | -2.417237059 | 3.481169510  |
| C | -0.709654463 | 1.228216493  | 4.147038259  |
| C | 0.709654463  | -1.228216493 | 4.147038259  |
| C | 0.709654463  | 1.228216493  | 4.147038259  |
| C | -0.709654463 | -1.228216493 | 4.147038259  |
| C | -1.424570788 | 0.000000000  | 4.062975181  |
| C | 1.424570788  | 0.000000000  | 4.062975181  |
| C | 0.000000000  | 0.670284769  | -3.853820771 |
| C | 0.000000000  | -0.670284769 | -3.853820771 |
| C | 0.000000000  | 3.425990101  | -2.516313771 |
| C | 0.000000000  | -3.425990101 | -2.516313771 |
| C | 0.000000000  | 3.903776283  | -1.060507403 |
| C | 0.000000000  | -3.903776283 | -1.060507403 |
| C | 0.000000000  | 3.825227776  | 1.812693796  |
| C | 0.000000000  | -3.825227776 | 1.812693796  |
| C | 0.000000000  | 3.370094052  | 3.258583875  |
| C | 0.000000000  | -3.370094052 | 3.258583875  |
| O | 0.000000000  | 4.516835289  | -3.421326416 |
| O | 0.000000000  | -4.516835289 | -3.421326416 |
| H | 0.000000000  | 4.149324890  | -4.324243946 |
| H | 0.000000000  | -4.149324890 | -4.324243946 |
| O | 0.000000000  | 4.517639545  | 4.091830353  |
| O | 0.000000000  | -4.517639545 | 4.091830353  |
| H | 0.000000000  | 4.213438263  | 5.014759730  |
| H | 0.000000000  | -4.213438263 | 5.014759730  |

|   |              |              |              |
|---|--------------|--------------|--------------|
| O | -3.404724887 | 4.416961813  | 2.019720795  |
| O | 3.404724887  | -4.416961813 | 2.019720795  |
| O | 3.404724887  | 4.416961813  | 2.019720795  |
| O | -3.404724887 | -4.416961813 | 2.019720795  |
| H | -3.624574884 | 4.943856379  | 1.229704702  |
| H | 3.624574884  | -4.943856379 | 1.229704702  |
| H | 3.624574884  | 4.943856379  | 1.229704702  |
| H | -3.624574884 | -4.943856379 | 1.229704702  |
| O | -3.356552143 | 4.608600393  | -1.142502040 |
| O | 3.356552143  | -4.608600393 | -1.142502040 |
| O | 3.356552143  | 4.608600393  | -1.142502040 |
| O | -3.356552143 | -4.608600393 | -1.142502040 |
| H | -4.215635545 | 4.268950186  | -1.451453445 |
| H | 4.215635545  | -4.268950186 | -1.451453445 |
| H | 4.215635545  | 4.268950186  | -1.451453445 |
| H | -4.215635545 | -4.268950186 | -1.451453445 |
| O | -4.491225395 | 2.037304169  | -2.809403598 |
| O | 4.491225395  | -2.037304169 | -2.809403598 |
| O | 4.491225395  | 2.037304169  | -2.809403598 |
| O | -4.491225395 | -2.037304169 | -2.809403598 |
| H | -5.124034468 | 1.319809319  | -2.992117695 |
| H | 5.124034468  | -1.319809319 | -2.992117695 |
| H | 5.124034468  | 1.319809319  | -2.992117695 |
| H | -5.124034468 | -1.319809319 | -2.992117695 |
| O | -5.328072454 | 1.969246541  | 0.058408092  |
| O | 5.328072454  | -1.969246541 | 0.058408092  |
| O | 5.328072454  | 1.969246541  | 0.058408092  |
| O | -5.328072454 | -1.969246541 | 0.058408092  |
| H | -5.413560808 | 2.325515220  | -0.845490987 |
| H | 5.413560808  | -2.325515220 | -0.845490987 |
| H | 5.413560808  | 2.325515220  | -0.845490987 |
| H | -5.413560808 | -2.325515220 | -0.845490987 |
| O | -1.475879928 | 2.070803046  | -5.080522762 |
| O | 1.475879928  | -2.070803046 | -5.080522762 |
| O | 1.475879928  | 2.070803046  | -5.080522762 |

|    |              |              |              |
|----|--------------|--------------|--------------|
| O  | -1.475879928 | -2.070803046 | -5.080522762 |
| H  | -2.253008701 | 2.654139209  | -5.025499839 |
| H  | 2.253008701  | -2.654139209 | -5.025499839 |
| H  | 2.253008701  | 2.654139209  | -5.025499839 |
| H  | -2.253008701 | -2.654139209 | -5.025499839 |
| Gd | 0.000000000  | 0.000000000  | 1.752189709  |

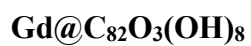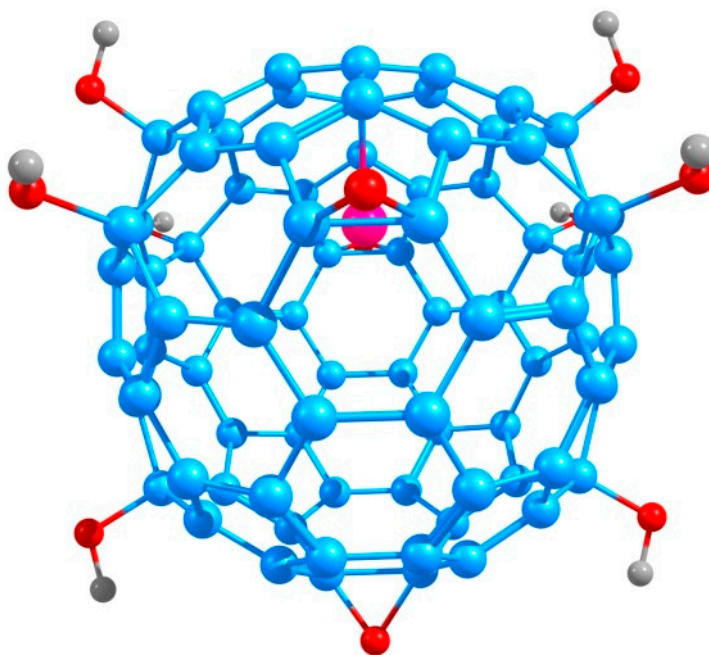

**MN15/def(2)-TZVP//H<sub>2</sub>O//Ground state**

|   |              |              |              |
|---|--------------|--------------|--------------|
| C | -2.641124995 | 0.000000000  | -2.847006070 |
| C | 2.641124995  | 0.000000000  | -2.847006070 |
| C | -3.089491994 | -1.175381000 | -2.173770467 |
| C | 3.089491994  | 1.175381000  | -2.173770467 |
| C | 3.089491994  | -1.175381000 | -2.173770467 |
| C | -3.089491994 | 1.175381000  | -2.173770467 |
| C | -3.932355992 | -0.751617431 | -1.013415963 |
| C | 3.932355992  | 0.751617431  | -1.013415963 |
| C | 3.932355992  | -0.751617431 | -1.013415963 |
| C | -3.932355992 | 0.751617431  | -1.013415963 |
| C | -2.562643995 | -3.390024107 | -1.132845018 |
| C | 2.562643995  | 3.390024107  | -1.132845018 |
| C | 2.562643995  | -3.390024107 | -1.132845018 |
| C | -2.562643995 | 3.390024107  | -1.132845018 |
| C | -3.719448493 | 1.479987324  | 0.255600149  |
| C | 3.719448493  | -1.479987324 | 0.255600149  |
| C | 3.719448493  | 1.479987324  | 0.255600149  |
| C | -3.719448493 | -1.479987324 | 0.255600149  |
| C | -3.099136994 | 2.724135720  | 0.151965493  |
| C | 3.099136994  | -2.724135720 | 0.151965493  |

|   |              |              |              |
|---|--------------|--------------|--------------|
| C | 3.099136994  | 2.724135720  | 0.151965493  |
| C | -3.099136994 | -2.724135720 | 0.151965493  |
| C | -2.336072996 | -2.345959115 | -2.209778151 |
| C | 2.336072996  | 2.345959115  | -2.209778151 |
| C | 2.336072996  | -2.345959115 | -2.209778151 |
| C | -2.336072996 | 2.345959115  | -2.209778151 |
| C | -3.663378493 | -0.736513613 | 1.497465232  |
| C | 3.663378493  | 0.736513613  | 1.497465232  |
| C | 3.663378493  | -0.736513613 | 1.497465232  |
| C | -3.663378493 | 0.736513613  | 1.497465232  |
| C | -2.399325495 | -3.267863921 | 1.252785829  |
| C | 2.399325495  | 3.267863921  | 1.252785829  |
| C | 2.399325495  | -3.267863921 | 1.252785829  |
| C | -2.399325495 | 3.267863921  | 1.252785829  |
| C | -2.389444995 | 2.630763666  | 2.469258122  |
| C | 2.389444995  | -2.630763666 | 2.469258122  |
| C | 2.389444995  | 2.630763666  | 2.469258122  |
| C | -2.389444995 | -2.630763666 | 2.469258122  |
| C | -3.083408494 | -1.387175304 | 2.613754158  |
| C | 3.083408494  | 1.387175304  | 2.613754158  |
| C | 3.083408494  | -1.387175304 | 2.613754158  |
| C | -3.083408494 | 1.387175304  | 2.613754158  |
| C | -2.383538995 | -0.687808198 | 3.657061543  |
| C | 2.383538995  | 0.687808198  | 3.657061543  |
| C | 2.383538995  | -0.687808198 | 3.657061543  |
| C | -2.383538995 | 0.687808198  | 3.657061543  |
| C | -1.209258998 | -2.631964606 | 3.312835336  |
| C | 1.209258998  | 2.631964606  | 3.312835336  |
| C | 1.209258998  | -2.631964606 | 3.312835336  |
| C | -1.209258998 | 2.631964606  | 3.312835336  |
| C | -1.220616498 | -1.461706644 | 4.052184615  |
| C | 1.220616498  | 1.461706644  | 4.052184615  |
| C | 1.220616498  | -1.461706644 | 4.052184615  |
| C | -1.220616498 | 1.461706644  | 4.052184615  |
| C | -1.178695998 | -3.901693650 | 0.773914650  |

|   |              |              |              |
|---|--------------|--------------|--------------|
| C | 1.178695998  | 3.901693650  | 0.773914650  |
| C | 1.178695998  | -3.901693650 | 0.773914650  |
| C | -1.178695998 | 3.901693650  | 0.773914650  |
| C | -1.193558498 | -3.859558085 | -0.631835129 |
| C | 1.193558498  | 3.859558085  | -0.631835129 |
| C | 1.193558498  | -3.859558085 | -0.631835129 |
| C | -1.193558498 | 3.859558085  | -0.631835129 |
| C | -1.180165998 | -2.400124946 | -3.020635406 |
| C | 1.180165998  | 2.400124946  | -3.020635406 |
| C | 1.180165998  | -2.400124946 | -3.020635406 |
| C | -1.180165998 | 2.400124946  | -3.020635406 |
| C | -0.727589499 | -1.233838279 | -3.677640124 |
| C | 0.727589499  | 1.233838279  | -3.677640124 |
| C | 0.727589499  | -1.233838279 | -3.677640124 |
| C | -0.727589499 | 1.233838279  | -3.677640124 |
| C | -1.443088997 | 0.000000000  | -3.610295673 |
| C | 1.443088997  | 0.000000000  | -3.610295673 |
| C | 0.000000000  | -0.791870131 | 4.543365067  |
| C | 0.000000000  | 0.791870131  | 4.543365067  |
| C | 0.000000000  | 3.514356509  | 3.036078180  |
| C | 0.000000000  | -3.514356509 | 3.036078180  |
| C | 0.000000000  | -3.894526444 | 1.535290009  |
| C | 0.000000000  | 3.894526444  | 1.535290009  |
| C | 0.000000000  | -3.819331596 | -1.362198180 |
| C | 0.000000000  | 3.819331596  | -1.362198180 |
| C | 0.000000000  | 3.367684791  | -2.807226694 |
| C | 0.000000000  | -3.367684791 | -2.807226694 |
| O | 0.000000000  | -4.729094117 | 3.759540875  |
| O | 0.000000000  | 4.729094117  | 3.759540875  |
| H | 0.000000000  | 4.514575748  | 4.704917283  |
| H | 0.000000000  | -4.514575748 | 4.704917283  |
| O | 0.000000000  | -4.487930641 | -3.647722410 |
| O | 0.000000000  | 4.487930641  | -3.647722410 |
| H | 0.000000000  | -4.191042518 | -4.570024359 |
| H | 0.000000000  | 4.191042518  | -4.570024359 |



|    |              |              |              |
|----|--------------|--------------|--------------|
| O  | -3.317836494 | -4.483679645 | -1.581447525 |
| O  | 3.317836494  | 4.483679645  | -1.581447525 |
| O  | 3.317836494  | -4.483679645 | -1.581447525 |
| O  | -3.317836494 | 4.483679645  | -1.581447525 |
| H  | -4.220056992 | -4.186492494 | -1.770802247 |
| H  | 4.220056992  | 4.186492494  | -1.770802247 |
| H  | 4.220056992  | -4.186492494 | -1.770802247 |
| H  | -4.220056992 | 4.186492494  | -1.770802247 |
| O  | -5.095010990 | 0.000000000  | -1.291810563 |
| O  | 5.095010990  | 0.000000000  | -1.291810563 |
| O  | 0.000000000  | 0.000000000  | 5.703410474  |
| Gd | 0.000000000  | 0.000000000  | -1.302107873 |

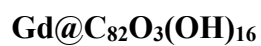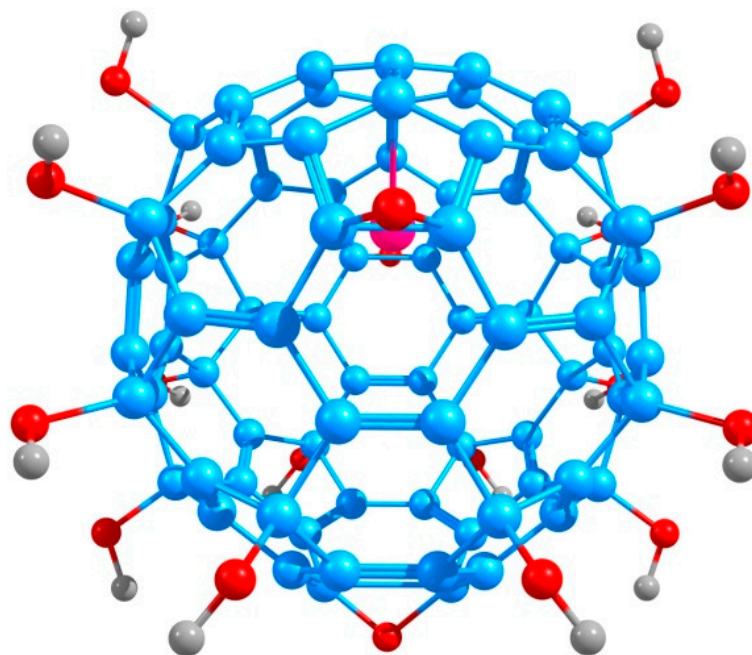

**MN15/def(2)-TZVP//H<sub>2</sub>O//Ground state**

|   |              |              |              |
|---|--------------|--------------|--------------|
| C | 2.621718813  | 0.000000000  | 3.106564816  |
| C | -2.621718813 | 0.000000000  | 3.106564816  |
| C | 3.075627098  | -1.178852273 | 2.451502964  |
| C | -3.075627098 | 1.178852273  | 2.451502964  |
| C | -3.075627098 | -1.178852273 | 2.451502964  |
| C | 3.075627098  | 1.178852273  | 2.451502964  |
| C | 3.785098694  | -0.748160918 | 1.232768539  |
| C | -3.785098694 | 0.748160918  | 1.232768539  |
| C | -3.785098694 | -0.748160918 | 1.232768539  |
| C | 3.785098694  | 0.748160918  | 1.232768539  |
| C | 2.543754341  | -3.394741777 | 1.396180664  |
| C | -2.543754341 | 3.394741777  | 1.396180664  |
| C | -2.543754341 | -3.394741777 | 1.396180664  |
| C | 2.543754341  | 3.394741777  | 1.396180664  |
| C | 3.511879345  | -1.476196471 | -0.021485682 |
| C | -3.511879345 | 1.476196471  | -0.021485682 |
| C | -3.511879345 | -1.476196471 | -0.021485682 |
| C | 3.511879345  | 1.476196471  | -0.021485682 |
| C | 3.045314754  | -2.741683356 | 0.096419961  |
| C | -3.045314754 | 2.741683356  | 0.096419961  |

|   |              |              |              |
|---|--------------|--------------|--------------|
| C | -3.045314754 | -2.741683356 | 0.096419961  |
| C | 3.045314754  | 2.741683356  | 0.096419961  |
| C | 2.302944855  | -2.360176058 | 2.481838433  |
| C | -2.302944855 | 2.360176058  | 2.481838433  |
| C | -2.302944855 | -2.360176058 | 2.481838433  |
| C | 2.302944855  | 2.360176058  | 2.481838433  |
| C | 3.456839482  | -0.683796565 | -1.274267018 |
| C | -3.456839482 | 0.683796565  | -1.274267018 |
| C | -3.456839482 | -0.683796565 | -1.274267018 |
| C | 3.456839482  | 0.683796565  | -1.274267018 |
| C | 2.546642787  | -3.558407220 | -1.070976806 |
| C | -2.546642787 | 3.558407220  | -1.070976806 |
| C | -2.546642787 | -3.558407220 | -1.070976806 |
| C | 2.546642787  | 3.558407220  | -1.070976806 |
| C | 2.337114557  | -2.658508185 | -2.234270344 |
| C | -2.337114557 | 2.658508185  | -2.234270344 |
| C | -2.337114557 | -2.658508185 | -2.234270344 |
| C | 2.337114557  | 2.658508185  | -2.234270344 |
| C | 3.225442934  | -1.472258887 | -2.563099791 |
| C | -3.225442934 | 1.472258887  | -2.563099791 |
| C | -3.225442934 | -1.472258887 | -2.563099791 |
| C | 3.225442934  | 1.472258887  | -2.563099791 |
| C | 2.332947737  | -0.698144693 | -3.556372570 |
| C | -2.332947737 | 0.698144693  | -3.556372570 |
| C | -2.332947737 | -0.698144693 | -3.556372570 |
| C | 2.332947737  | 0.698144693  | -3.556372570 |
| C | 1.204870122  | -2.641357216 | -2.948598068 |
| C | -1.204870122 | 2.641357216  | -2.948598068 |
| C | -1.204870122 | -2.641357216 | -2.948598068 |
| C | 1.204870122  | 2.641357216  | -2.948598068 |
| C | 1.203982309  | -1.491497102 | -3.857592318 |
| C | -1.203982309 | 1.491497102  | -3.857592318 |
| C | -1.203982309 | -1.491497102 | -3.857592318 |
| C | 1.203982309  | 1.491497102  | -3.857592318 |
| C | 1.191416508  | -3.965350038 | -0.523106760 |

|   |              |              |              |
|---|--------------|--------------|--------------|
| C | -1.191416508 | 3.965350038  | -0.523106760 |
| C | -1.191416508 | -3.965350038 | -0.523106760 |
| C | 1.191416508  | 3.965350038  | -0.523106760 |
| C | 1.192784904  | -3.883471596 | 0.875905033  |
| C | -1.192784904 | 3.883471596  | 0.875905033  |
| C | -1.192784904 | -3.883471596 | 0.875905033  |
| C | 1.192784904  | 3.883471596  | 0.875905033  |
| C | 1.180122550  | -2.430722877 | 3.293005606  |
| C | -1.180122550 | 2.430722877  | 3.293005606  |
| C | -1.180122550 | -2.430722877 | 3.293005606  |
| C | 1.180122550  | 2.430722877  | 3.293005606  |
| C | 0.711807083  | -1.233575929 | 3.951582842  |
| C | -0.711807083 | 1.233575929  | 3.951582842  |
| C | -0.711807083 | -1.233575929 | 3.951582842  |
| C | 0.711807083  | 1.233575929  | 3.951582842  |
| C | 1.421824669  | 0.000000000  | 3.878196351  |
| C | -1.421824669 | 0.000000000  | 3.878196351  |
| C | 0.000000000  | -1.064215989 | -4.432245190 |
| C | 0.000000000  | 1.064215989  | -4.432245190 |
| C | 0.000000000  | -3.533516374 | -2.725171163 |
| C | 0.000000000  | 3.533516374  | -2.725171163 |
| C | 0.000000000  | -3.957372391 | -1.256471607 |
| C | 0.000000000  | 3.957372391  | -1.256471607 |
| C | 0.000000000  | -3.816297532 | 1.600951710  |
| C | 0.000000000  | 3.816297532  | 1.600951710  |
| C | 0.000000000  | -3.369621114 | 3.049907494  |
| C | 0.000000000  | 3.369621114  | 3.049907494  |
| O | 0.000000000  | -4.671966257 | -3.561689242 |
| O | 0.000000000  | 4.671966257  | -3.561689242 |
| H | 0.000000000  | -4.379154295 | -4.489187974 |
| H | 0.000000000  | 4.379154295  | -4.489187974 |
| O | 0.000000000  | -4.546073776 | 3.856820293  |
| O | 0.000000000  | 4.546073776  | 3.856820293  |
| H | 0.000000000  | -4.256171711 | 4.784094147  |
| H | 0.000000000  | 4.256171711  | 4.784094147  |

|    |              |              |              |
|----|--------------|--------------|--------------|
| O  | 3.329300859  | -4.490734736 | 1.818357353  |
| O  | -3.329300859 | 4.490734736  | 1.818357353  |
| O  | -3.329300859 | -4.490734736 | 1.818357353  |
| O  | 3.329300859  | 4.490734736  | 1.818357353  |
| H  | 4.167353888  | -4.140210630 | 2.164207039  |
| H  | -4.167353888 | 4.140210630  | 2.164207039  |
| H  | -4.167353888 | -4.140210630 | 2.164207039  |
| H  | 4.167353888  | 4.140210630  | 2.164207039  |
| O  | 5.001750340  | 0.000000000  | 1.339935586  |
| O  | -5.001750340 | 0.000000000  | 1.339935586  |
| O  | 0.000000000  | 0.000000000  | -5.317409506 |
| O  | 3.358189619  | -4.684075248 | -1.342018597 |
| O  | -3.358189619 | 4.684075248  | -1.342018597 |
| O  | -3.358189619 | -4.684075248 | -1.342018597 |
| O  | 3.358189619  | 4.684075248  | -1.342018597 |
| H  | 4.203836979  | -4.358117524 | -1.696081360 |
| H  | -4.203836979 | 4.358117524  | -1.696081360 |
| H  | -4.203836979 | -4.358117524 | -1.696081360 |
| H  | 4.203836979  | 4.358117524  | -1.696081360 |
| O  | 4.496257437  | -1.846138674 | -3.050419450 |
| O  | -4.496257437 | 1.846138674  | -3.050419450 |
| O  | -4.496257437 | -1.846138674 | -3.050419450 |
| O  | 4.496257437  | 1.846138674  | -3.050419450 |
| H  | 4.372582209  | -2.445653436 | -3.806619360 |
| H  | -4.372582209 | 2.445653436  | -3.806619360 |
| H  | -4.372582209 | -2.445653436 | -3.806619360 |
| H  | 4.372582209  | 2.445653436  | -3.806619360 |
| Gd | 0.000000000  | 0.000000000  | 1.532155982  |

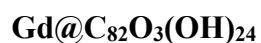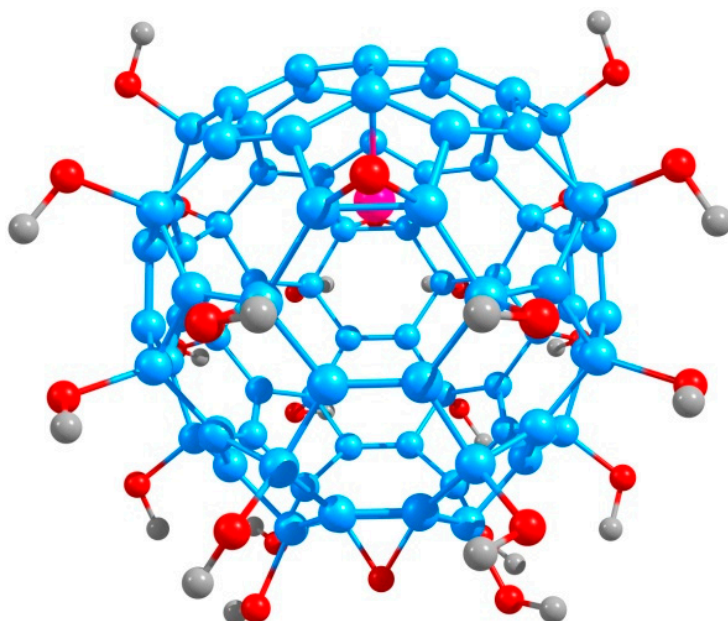

**MN15/def(2)-TZVP//H<sub>2</sub>O//Ground state**

|   |              |              |              |
|---|--------------|--------------|--------------|
| C | -2.625404200 | -0.389511810 | -3.459398260 |
| C | 2.659248040  | -0.300919370 | -3.401324180 |
| C | -3.073256990 | -1.495575510 | -2.681717900 |
| C | 3.078355850  | 0.949555930  | -2.859398990 |
| C | 3.132388820  | -1.387414510 | -2.621883450 |
| C | -3.101732220 | 0.845642760  | -2.929818910 |
| C | -3.928077350 | -0.953798880 | -1.589039610 |
| C | 3.921760650  | 0.660147460  | -1.670675690 |
| C | 3.951723290  | -0.821502560 | -1.509062850 |
| C | -3.945231830 | 0.528470720  | -1.749218170 |
| C | -2.480493950 | -3.538339210 | -1.390184900 |
| C | 2.498497150  | 3.240698580  | -2.085708190 |
| C | 2.609274410  | -3.430873990 | -1.331007590 |
| C | -2.596554670 | 3.152036770  | -2.131809260 |
| C | -3.973643310 | -1.610227400 | -0.216907480 |
| C | 3.965046800  | 1.611145540  | -0.480309700 |
| C | 3.996326300  | -1.478062120 | -0.137588430 |
| C | -4.028232020 | 1.468202710  | -0.554169550 |
| C | -3.003022040 | -2.749397240 | -0.213532040 |
| C | 3.022566260  | 2.750475320  | -0.752302850 |

|   |              |              |              |
|---|--------------|--------------|--------------|
| C | 3.030369660  | -2.598355990 | -0.156007730 |
| C | -3.116625610 | 2.633868510  | -0.807769130 |
| C | -2.267579550 | -2.639382960 | -2.578199840 |
| C | 2.306951980  | 2.097441080  | -3.045996550 |
| C | 2.403521880  | -2.584001280 | -2.562418940 |
| C | -2.356249480 | 2.020573650  | -3.096260310 |
| C | -3.619636160 | -0.604982910 | 0.902284840  |
| C | 3.575237680  | 0.875152960  | 0.822889740  |
| C | 3.599991780  | -0.472397490 | 0.963451900  |
| C | -3.627848170 | 0.738660740  | 0.754168000  |
| C | -2.491513940 | -3.387018190 | 1.037431770  |
| C | 2.453584960  | 3.619462910  | 0.323885500  |
| C | 2.569096110  | -3.283500890 | 1.066515500  |
| C | -2.606472880 | 3.528084280  | 0.276908770  |
| C | -2.299619170 | -2.354112070 | 2.083147440  |
| C | 2.228483190  | 2.827964440  | 1.556966440  |
| C | 2.317946270  | -2.265034890 | 2.104537610  |
| C | -2.376299160 | 2.742255500  | 1.511221570  |
| C | -3.284121610 | -1.229330220 | 2.263381340  |
| C | 3.210586700  | 1.780277770  | 2.002707850  |
| C | 3.259794380  | -1.112495280 | 2.318234520  |
| C | -3.327171460 | 1.663516530  | 1.944872420  |
| C | -2.436062470 | -0.317509870 | 3.133326620  |
| C | 2.349723190  | 1.082813370  | 3.040839360  |
| C | 2.370961540  | -0.234817320 | 3.184378020  |
| C | -2.462879730 | 1.000506610  | 3.001655550  |
| C | -1.202926080 | -2.248043700 | 2.843533160  |
| C | 1.121604230  | 2.900367290  | 2.305272080  |
| C | 1.194215430  | -2.184754800 | 2.834014600  |
| C | -1.276239790 | 2.839279990  | 2.264524720  |
| C | -1.329461950 | -1.091425940 | 3.818591340  |
| C | 1.225778810  | 1.983399140  | 3.512359130  |
| C | 1.258423450  | -1.048298000 | 3.826045540  |
| C | -1.363875390 | 1.937347130  | 3.476567300  |
| C | -1.137461620 | -3.865119950 | 0.570310400  |

|   |              |              |              |
|---|--------------|--------------|--------------|
| C | 1.108208580  | 3.973453800  | -0.264325230 |
| C | 1.237033510  | -3.825344270 | 0.601778150  |
| C | -1.264160050 | 3.934260010  | -0.286299390 |
| C | -1.127008090 | -3.953642600 | -0.819983930 |
| C | 1.127230450  | 3.750405220  | -1.643701460 |
| C | 1.254011780  | -3.900309940 | -0.802417630 |
| C | -1.251230420 | 3.711924120  | -1.665794850 |
| C | -1.111315980 | -2.765058010 | -3.356099160 |
| C | 1.163530380  | 2.036026860  | -3.851655850 |
| C | 1.261816200  | -2.743039410 | -3.363041370 |
| C | -1.197385970 | 1.999352810  | -3.873525320 |
| C | -0.664274900 | -1.664781610 | -4.124377370 |
| C | 0.727367230  | 0.789314680  | -4.353301430 |
| C | 0.780452380  | -1.651148220 | -4.132518160 |
| C | -0.710434600 | 0.766422390  | -4.368616510 |
| C | -1.407878630 | -0.454068630 | -4.190039910 |
| C | 1.463163580  | -0.408429860 | -4.157379210 |
| C | -0.044544550 | -0.269272260 | 3.966075840  |
| C | -0.062806100 | 1.208091660  | 3.803108300  |
| C | 0.024131380  | -3.128199450 | 2.723681680  |
| C | -0.096276090 | 3.733580350  | 1.967040230  |
| C | 0.046111150  | -3.744463510 | 1.321370000  |
| C | -0.085653190 | 4.020196760  | 0.462413330  |
| C | 0.078451530  | -3.963347770 | -1.542878090 |
| C | -0.053195190 | 3.601476800  | -2.371228740 |
| C | 0.083174440  | -3.674594660 | -3.026153160 |
| C | -0.032679990 | 2.988089060  | -3.750714090 |
| O | 0.054330010  | -4.128871400 | 3.732496720  |
| O | -0.154554770 | 4.938209090  | 2.708599760  |
| H | 0.351601390  | -3.713005360 | 4.561205120  |
| H | -0.327345770 | 4.717284530  | 3.641163150  |
| O | 0.086982220  | -4.905060110 | -3.730984510 |
| O | -0.040126540 | 4.033930120  | -4.705329770 |
| H | 0.081610090  | -4.705365800 | -4.682324640 |
| H | -0.024392920 | 3.632714080  | -5.590426580 |



|   |              |              |              |
|---|--------------|--------------|--------------|
| O | -3.326285550 | -4.625820730 | -1.728998360 |
| O | 3.322180330  | 4.242719330  | -2.654578980 |
| O | 3.468928230  | -4.543723390 | -1.641612510 |
| O | -3.453187740 | 4.124861170  | -2.701602300 |
| H | -3.518567720 | -5.107316820 | -0.903214670 |
| H | 3.489083790  | 4.909490980  | -1.963825840 |
| H | 3.757567990  | -4.881200270 | -0.774391780 |
| H | -3.651298680 | 4.780565040  | -2.008450900 |
| O | -5.114364800 | -0.261196440 | -1.978321090 |
| O | 5.116027670  | -0.083560070 | -1.901202200 |
| O | -0.069261320 | 0.601379420  | 5.077867760  |
| O | -3.321480960 | -4.467455140 | 1.455054740  |
| O | 3.254247330  | 4.775946640  | 0.539066190  |
| O | 3.411816570  | -4.358460770 | 1.552755250  |
| O | -3.457003430 | 4.649835240  | 0.475388190  |
| H | -4.197630350 | -4.095400540 | 1.664826360  |
| H | 4.120684790  | 4.471531470  | 0.866050610  |
| H | 4.307168370  | -3.979511660 | 1.596188950  |
| H | -4.313004270 | 4.313451540  | 0.798854340  |
| O | -4.494705280 | -1.660373760 | 2.856992440  |
| O | 4.404049100  | 2.357681340  | 2.505535810  |
| O | 4.423702360  | -1.583591020 | 2.974147320  |
| O | -4.505468990 | 2.273061400  | 2.433016910  |
| H | -4.276078370 | -2.108211360 | 3.693756720  |
| H | 4.161774450  | 2.970552320  | 3.222382810  |
| H | 5.066122130  | -0.854022550 | 3.013475070  |
| H | -5.162086790 | 1.576111500  | 2.606357400  |
| O | -5.268370310 | -2.142346230 | 0.028860020  |
| O | 5.270479580  | 2.161522260  | -0.350843980 |
| O | 5.355212320  | -1.903524260 | 0.127572310  |
| O | -5.349671150 | 1.968793620  | -0.417650190 |
| H | -5.911741530 | -1.438458020 | -0.177033960 |
| H | 5.894174110  | 1.412315220  | -0.391009850 |
| H | 5.938320560  | -1.145119580 | -0.061203710 |
| H | -5.951589840 | 1.206552500  | -0.514546040 |

|    |              |              |              |
|----|--------------|--------------|--------------|
| O  | -1.758272680 | -1.542491430 | 5.087863190  |
| O  | 1.610082320  | 2.706862500  | 4.665384220  |
| O  | 1.523196270  | -1.561647770 | 5.123306200  |
| O  | -1.644834640 | 2.716724730  | 4.626018720  |
| H  | -1.042077070 | -2.063094650 | 5.492440050  |
| H  | 0.843831830  | 3.215363840  | 4.986734520  |
| H  | 2.298739270  | -2.146572050 | 5.058644420  |
| H  | -2.428499520 | 3.265256150  | 4.443637850  |
| Gd | -0.027696265 | -0.200455853 | -1.984064038 |
